# Supplementary material for: A transition metal-free tandem process to pyridazinopyrido[3,2-f][1,4]thiazepine-diones via Smiles rearrangement
Source: Royal Society of Chemistry journal article supplement (doi:10.1039/c3ob40719e), 2013-01-01

# Supporting Information

## A transition metal-free tandem process to pyridazinopyrido[3,2-*f*][1,4]thiazepine-diones via Smiles rearrangement

Xiaoyi Niu<sup>1</sup>, Bingchuan Yang<sup>1</sup>, Yanqiu Li, Shuai Fang, Zixiao Huang, Caixia Xie and Chen Ma\*

<sup>1</sup>These authors contributed equally to this work  
School of Chemistry and Chemical Engineering, Shandong University, Jinan, 250100, P R China

### Crystal Structure Determination

The diffraction data was collected with a Bruker SMART CCD diffractometer using a graphite monochromated Mo K $\alpha$  radiation ( $\lambda = 0.71073 \text{ \AA}$ ) at 273(2) K. The structures were solved by direct methods with SHELXS-97 program and refinements on F<sup>2</sup> were performed with SHELXL-97 program by full-matrix least-squares techniques with anisotropic thermal parameters for the non-hydrogen atoms.

**Table S1.** Details of Crystal Structure Determination for **3f**.

|                                                                               |                                                                   |
|-------------------------------------------------------------------------------|-------------------------------------------------------------------|
| Compound                                                                      | <b>3f</b>                                                         |
| Chemical formula                                                              | C <sub>21</sub> H <sub>17</sub> ClN <sub>4</sub> O <sub>3</sub> S |
| Formula Mass                                                                  | 407.12                                                            |
| Crystal system                                                                | monoclinic                                                        |
| <i>a</i> /Å                                                                   | 10.901                                                            |
| <i>b</i> /Å                                                                   | 5.9316                                                            |
| <i>c</i> /Å                                                                   | 30.312                                                            |
| $\alpha$ /°                                                                   | 90.00                                                             |
| $\beta$ /°                                                                    | 91.762                                                            |
| $\gamma$ /°                                                                   | 90.00                                                             |
| Unit cell volume/Å <sup>3</sup>                                               | 1959.1                                                            |
| Temperature/K                                                                 | 293(2)                                                            |
| Space group                                                                   | <i>P</i> 2 <sub>1</sub> / <i>n</i>                                |
| No. of formula units per unit cell, <i>Z</i>                                  | 4                                                                 |
| No. of reflections measured                                                   | 10500                                                             |
| No. of independent reflections                                                | 4289                                                              |
| <i>R</i> <sub>int</sub>                                                       | 0.0206                                                            |
| Final <i>R</i> <sub><i>I</i></sub> values ( <i>I</i> > 2σ( <i>I</i> ))        | 0.0558                                                            |
| Final <i>wR</i> ( <i>F</i> <sup>2</sup> ) values ( <i>I</i> > 2σ( <i>I</i> )) | 0.1595                                                            |
| Final <i>R</i> <sub><i>I</i></sub> values (all data)                          | 0.1240                                                            |
| Final <i>wR</i> ( <i>F</i> <sup>2</sup> ) values (all data)                   | 0.2185                                                            |

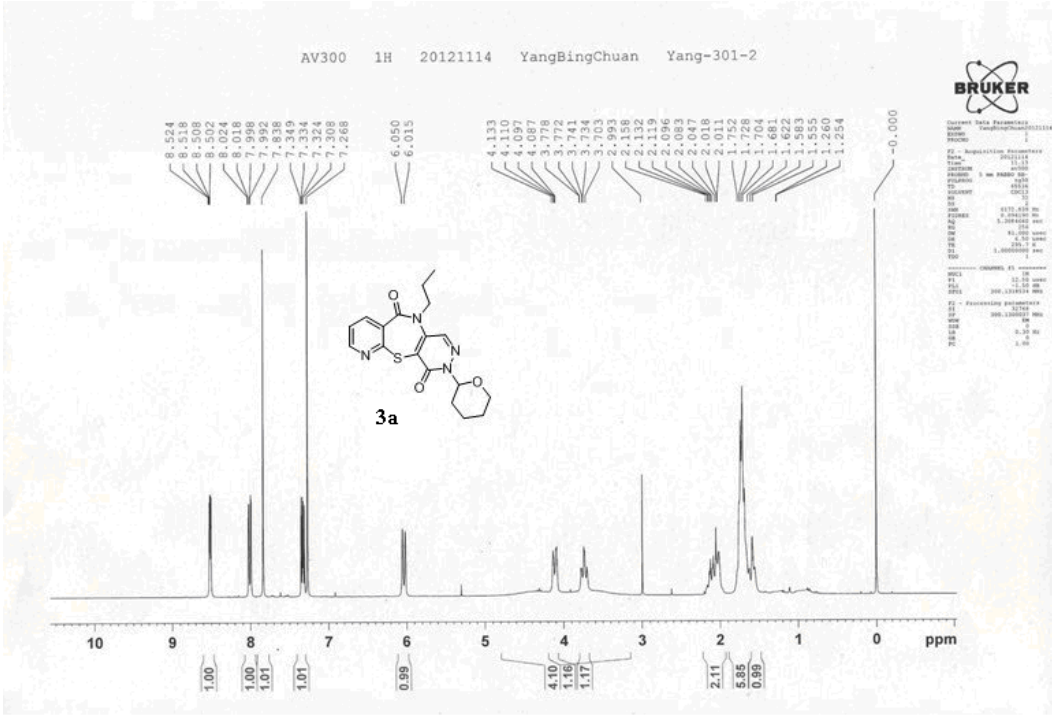

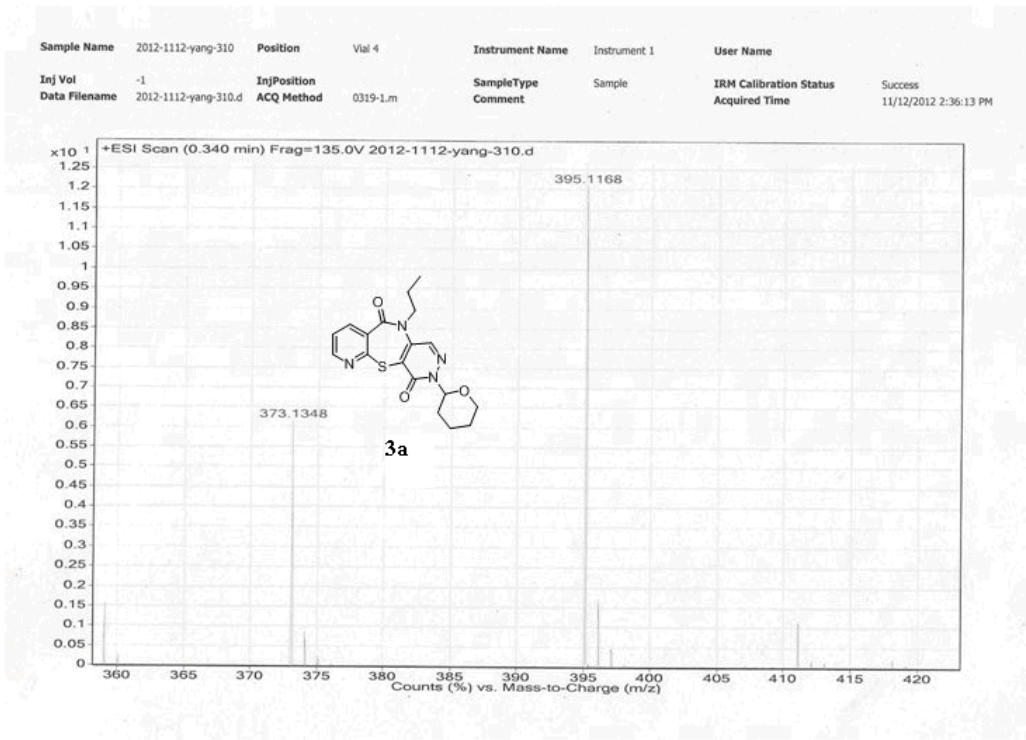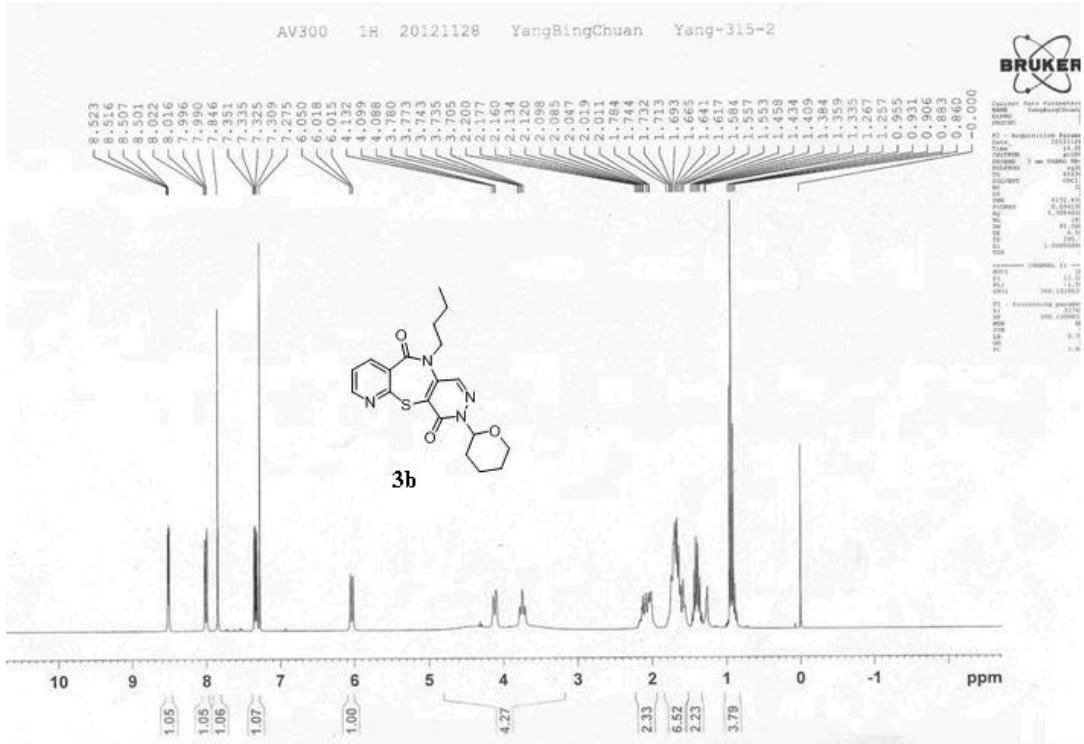

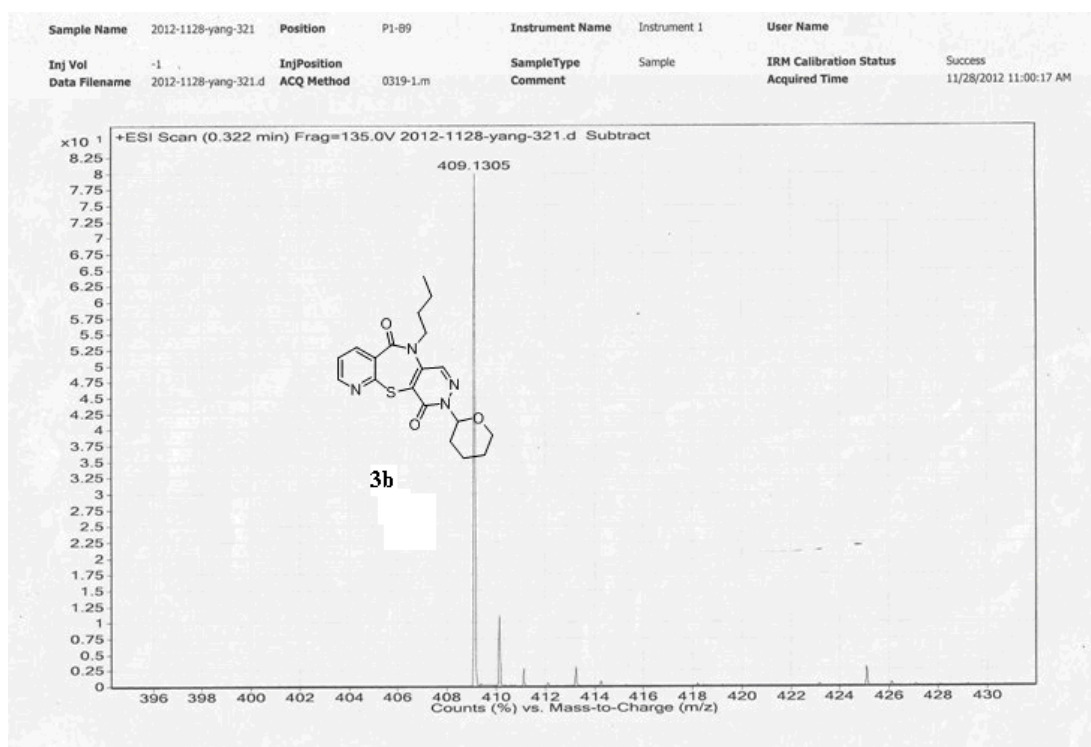

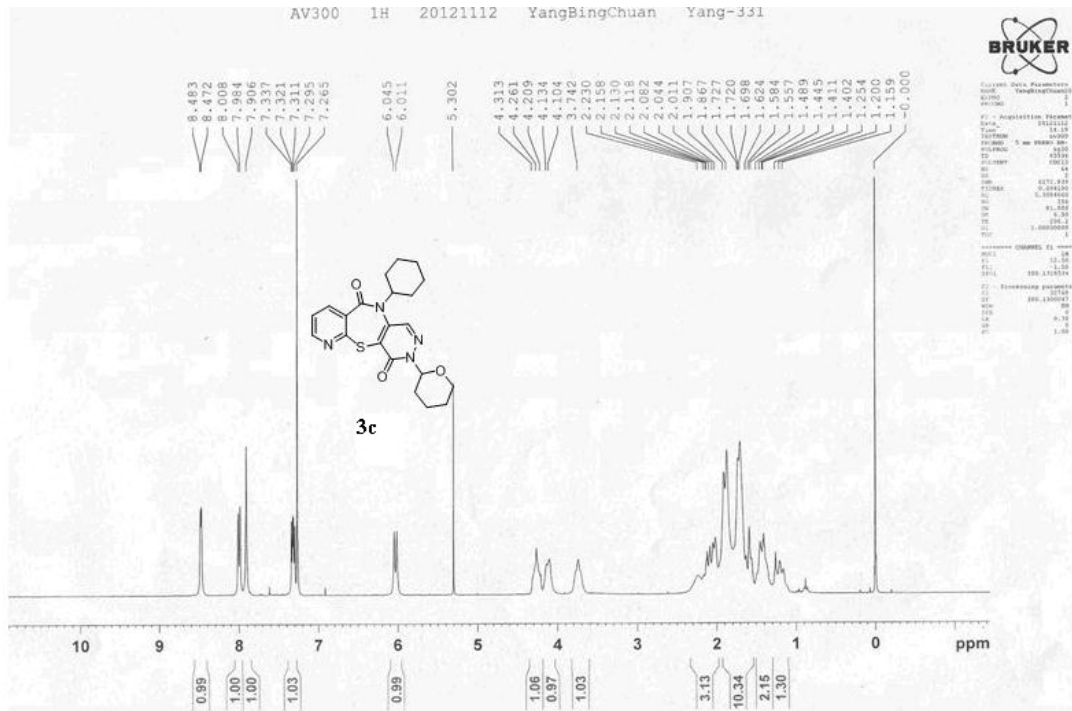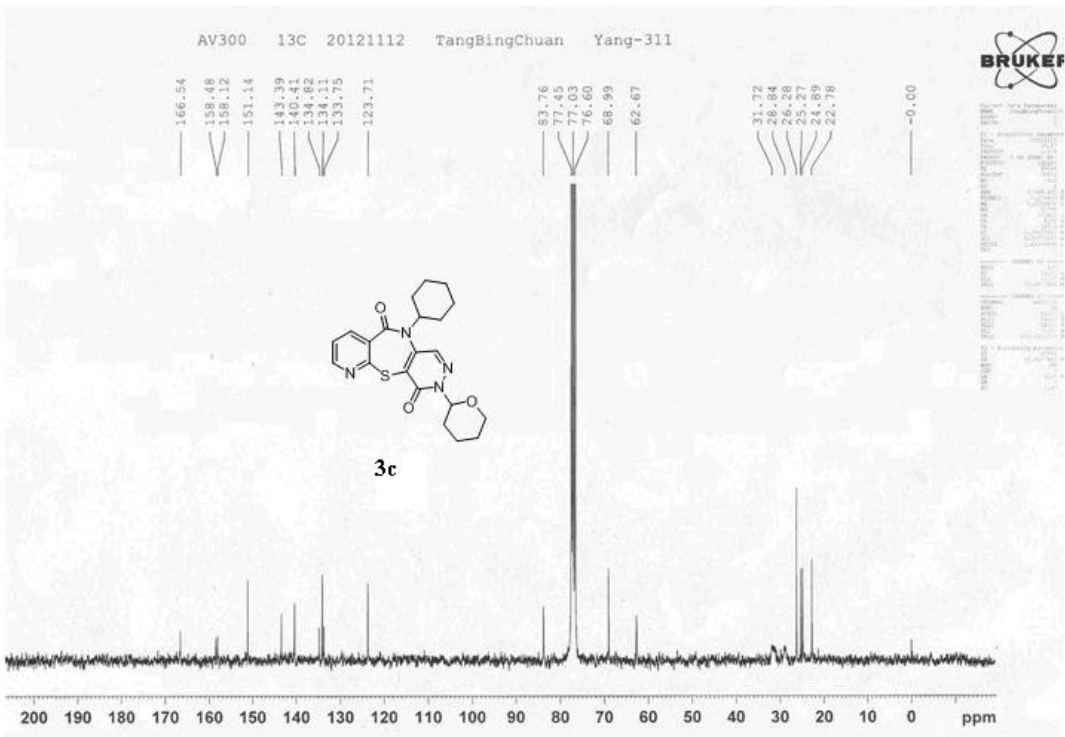



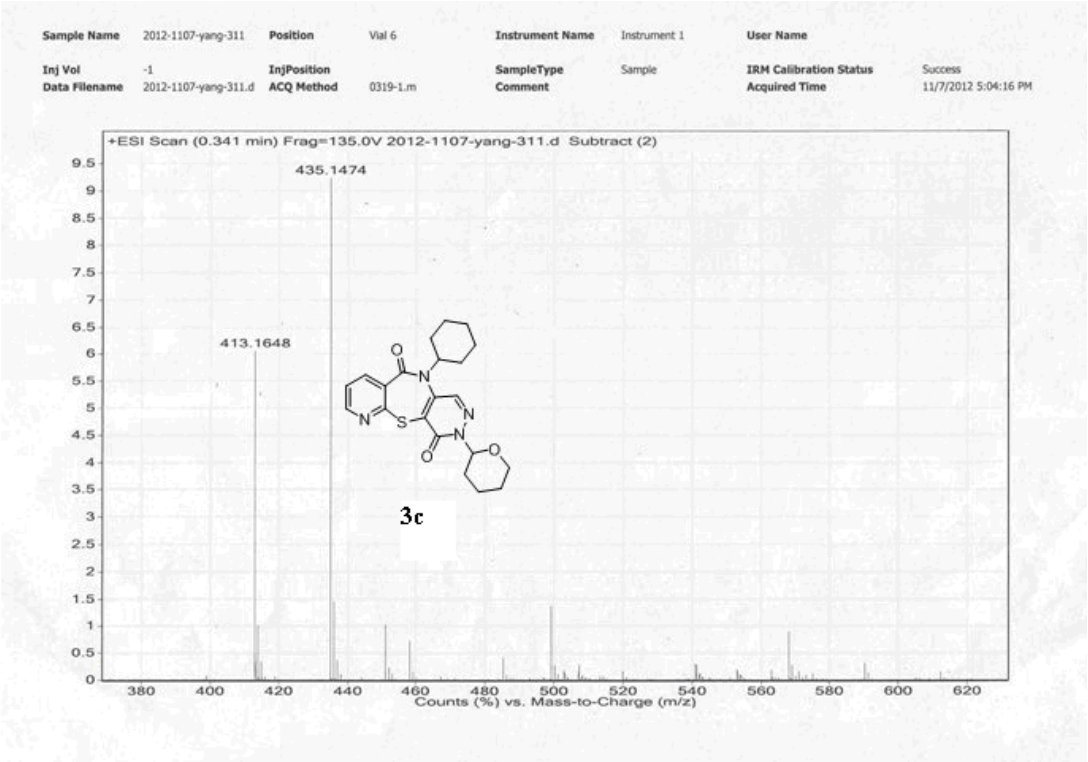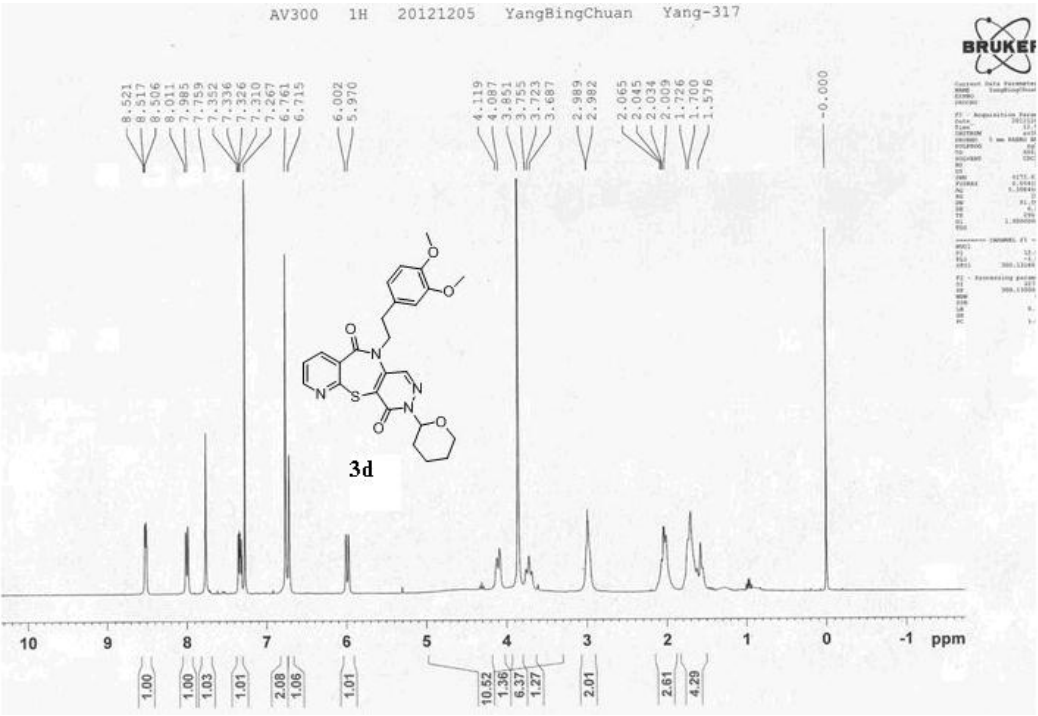

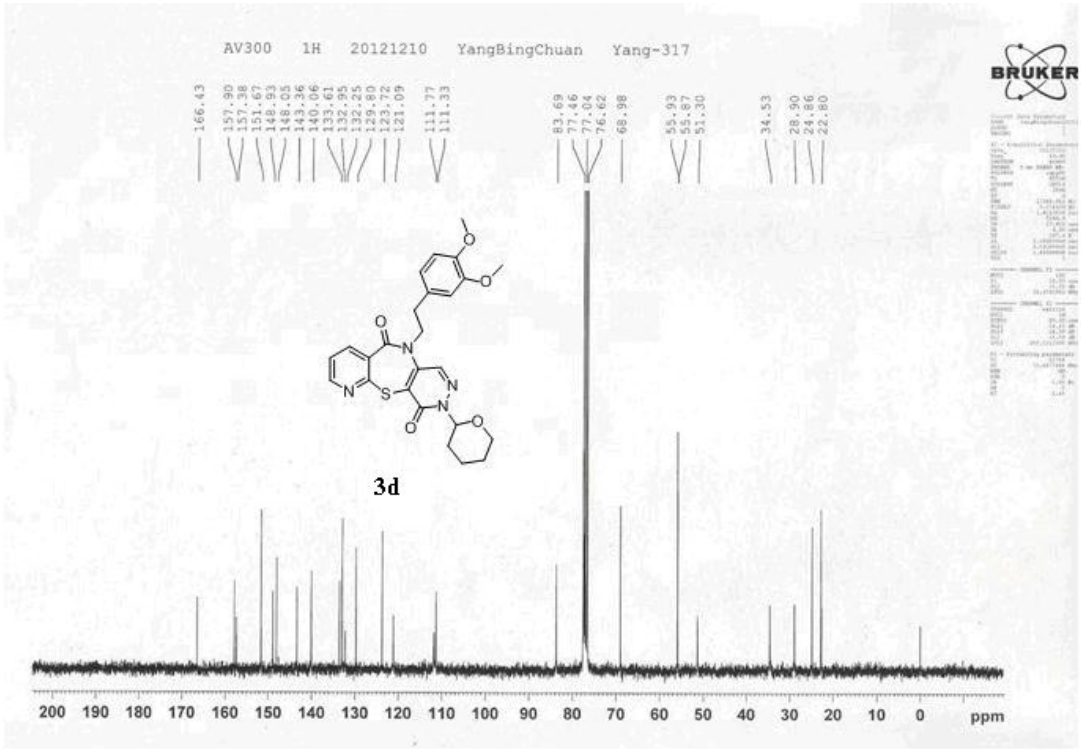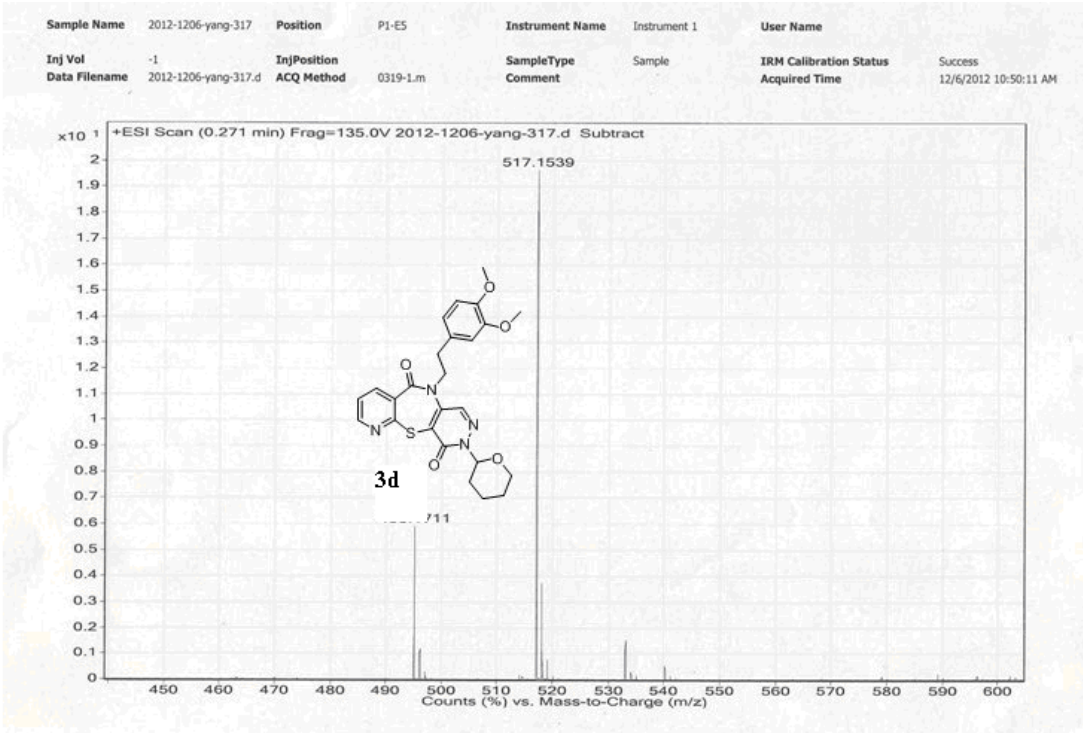

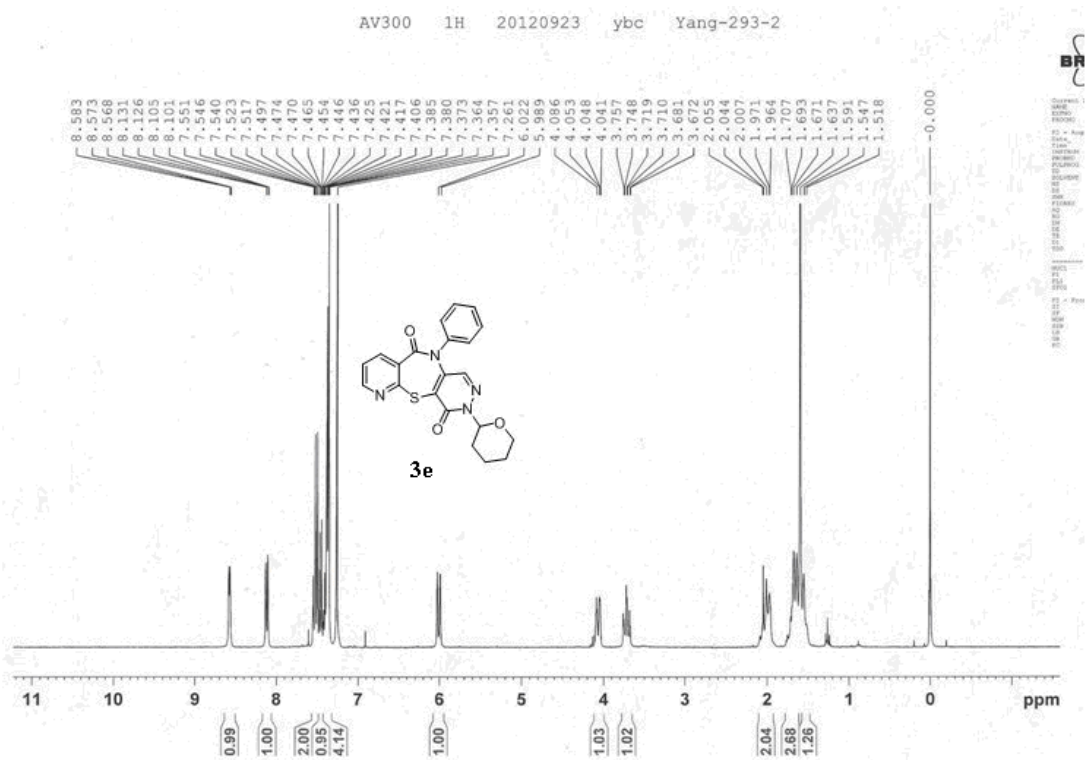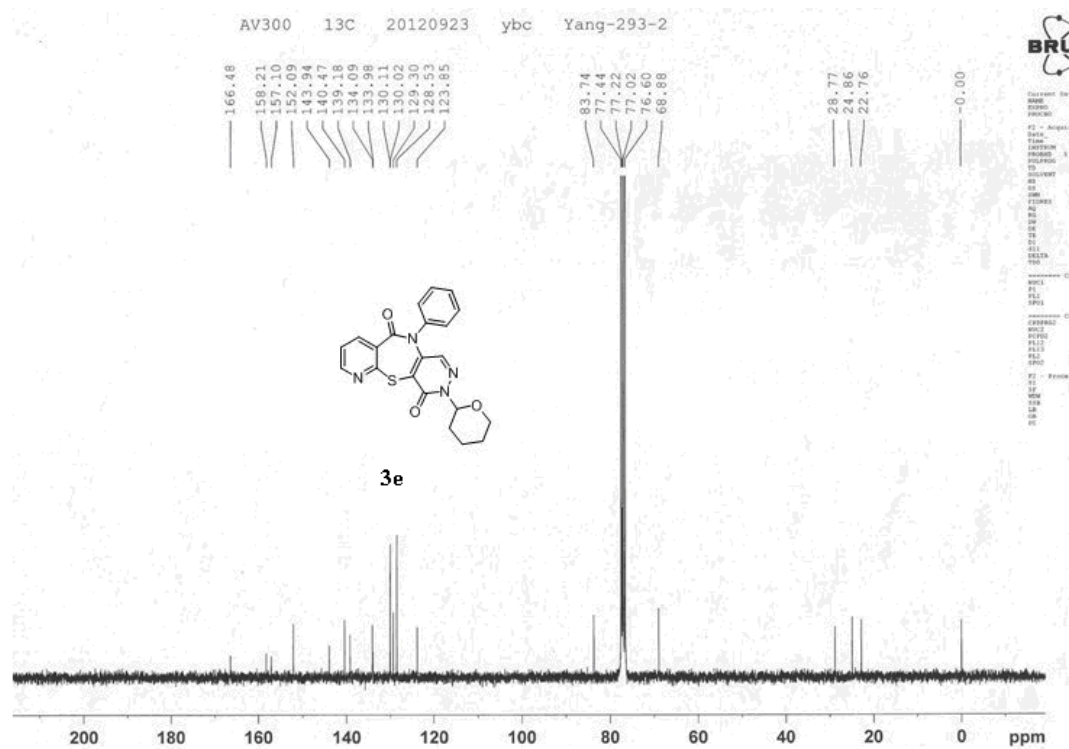



|               |                      |             |          |                 |              |                        |                      |
|---------------|----------------------|-------------|----------|-----------------|--------------|------------------------|----------------------|
| Sample Name   | 2012-0917-yang-293   | Position    | Vial 8   | Instrument Name | Instrument 1 | User Name              |                      |
| Inj Vol       | -1                   | InjPosition |          | SampleType      | Sample       | IRM Calibration Status | Success              |
| Data Filename | 2012-0917-yang-293.d | ACQ Method  | 0319-1.m | Comment         |              | Acquired Time          | 9/17/2012 3:35:50 PM |

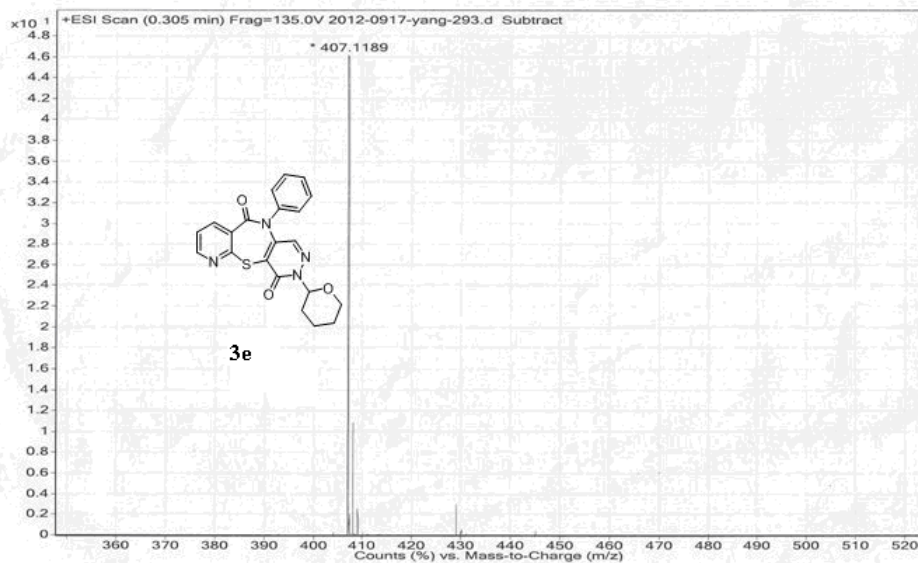

AV300 1H 20121030 YangBingChuan Yang-306

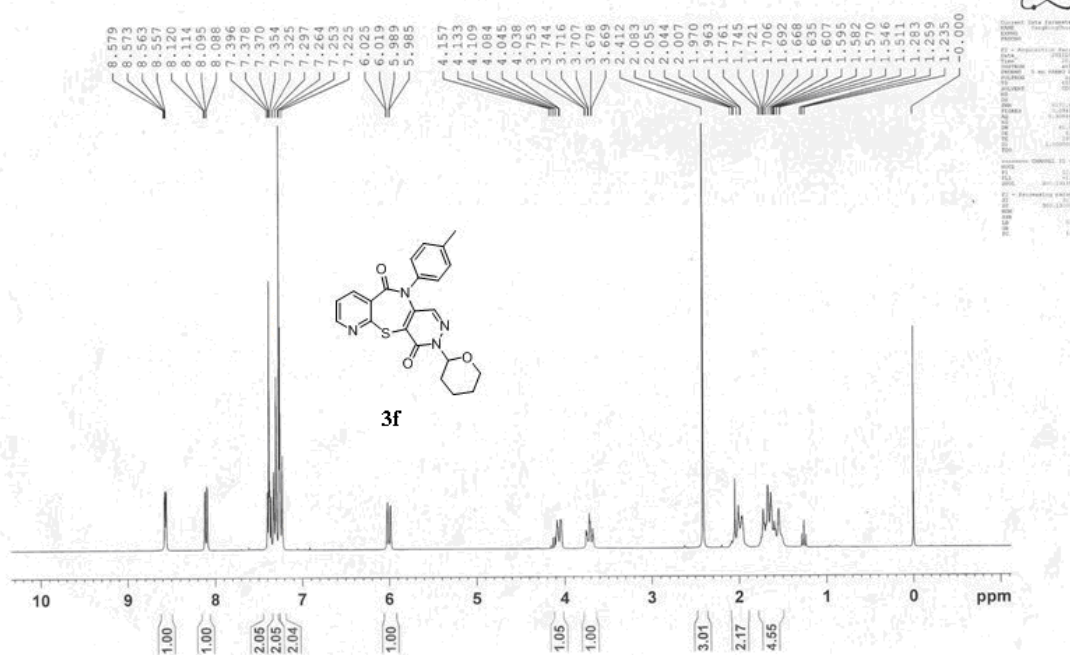

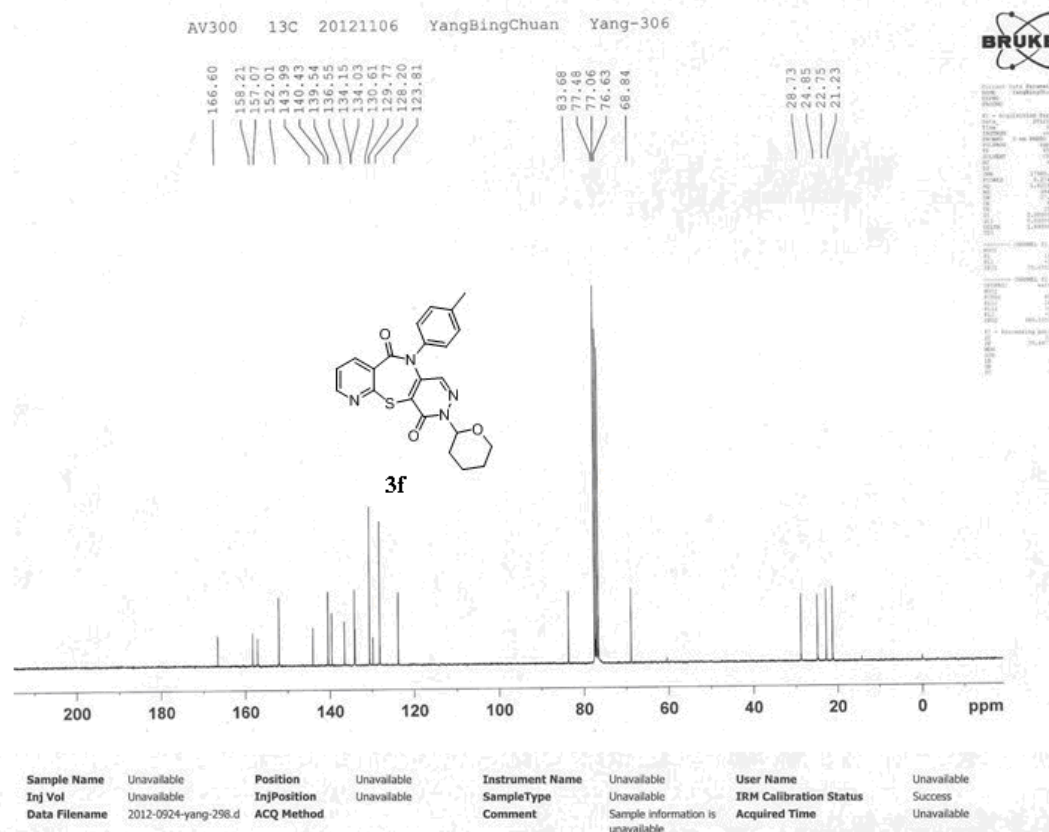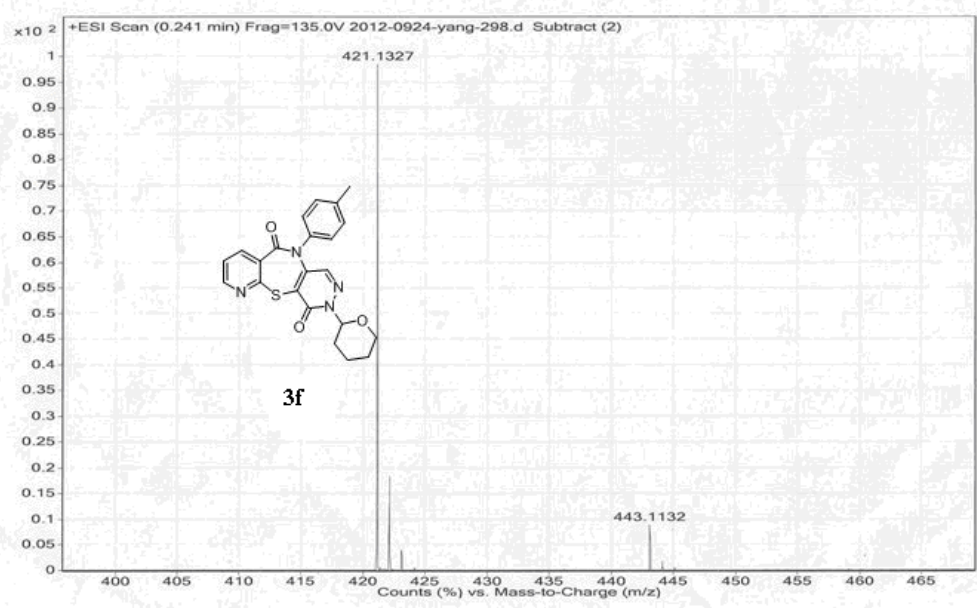



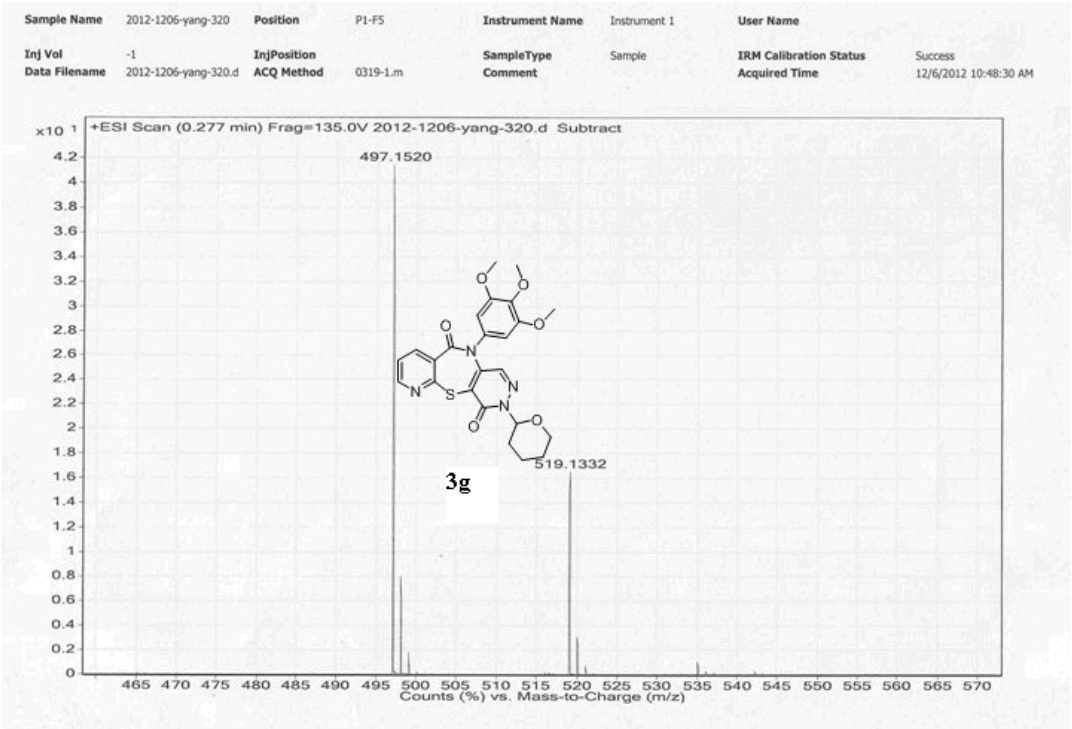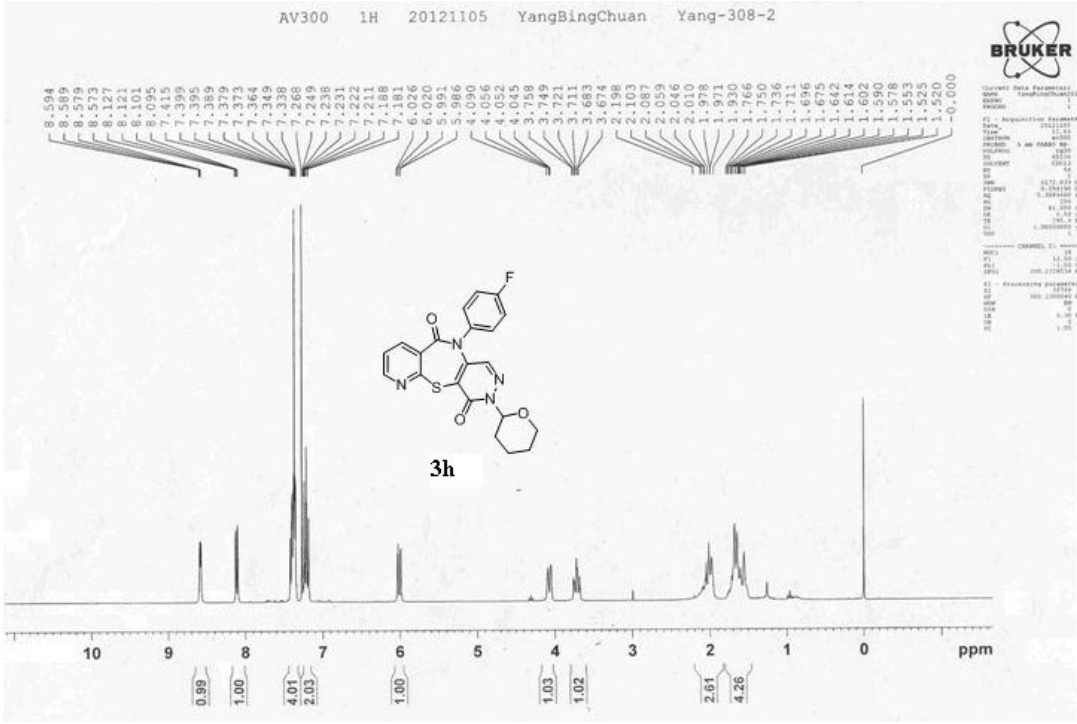

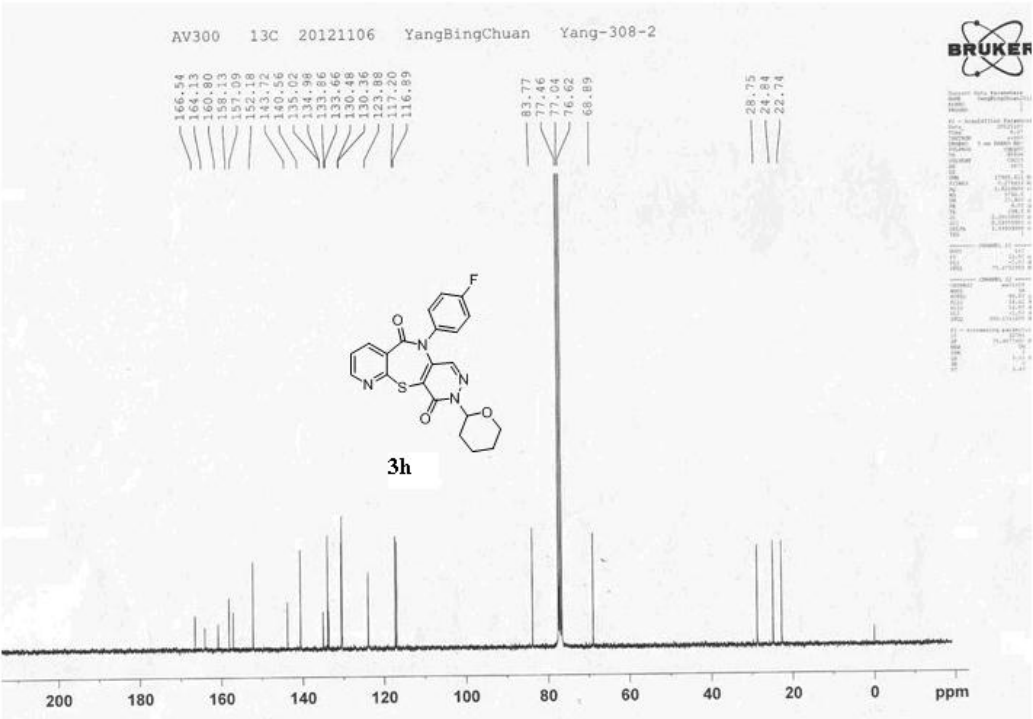



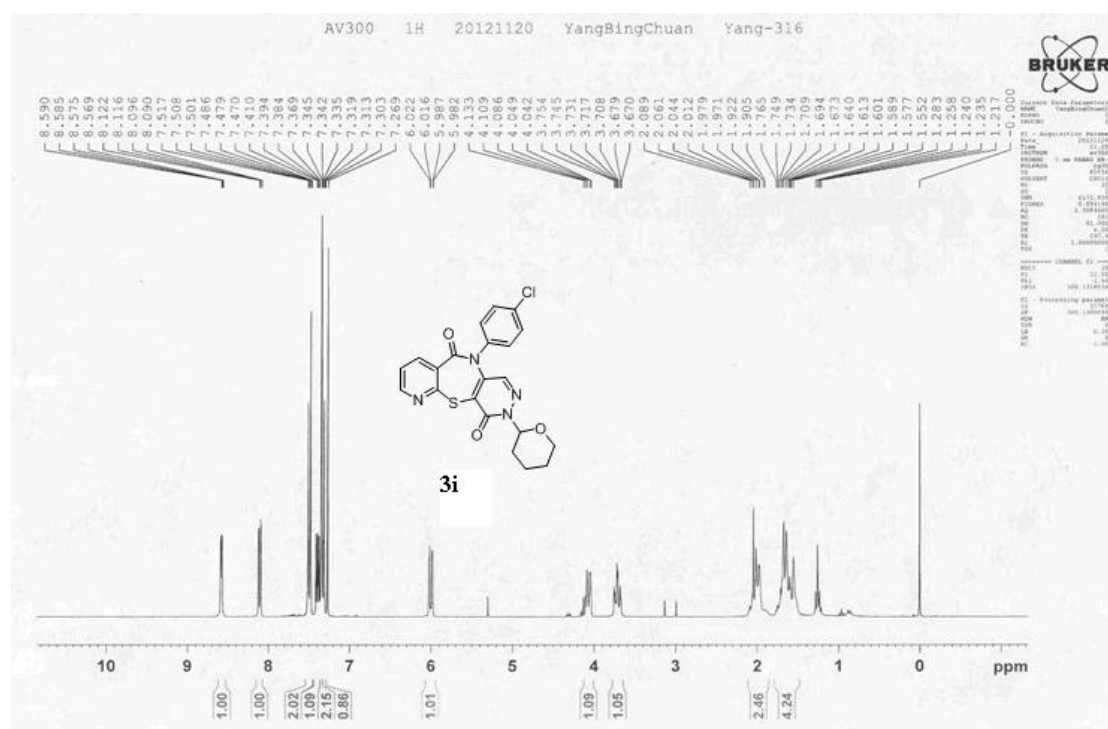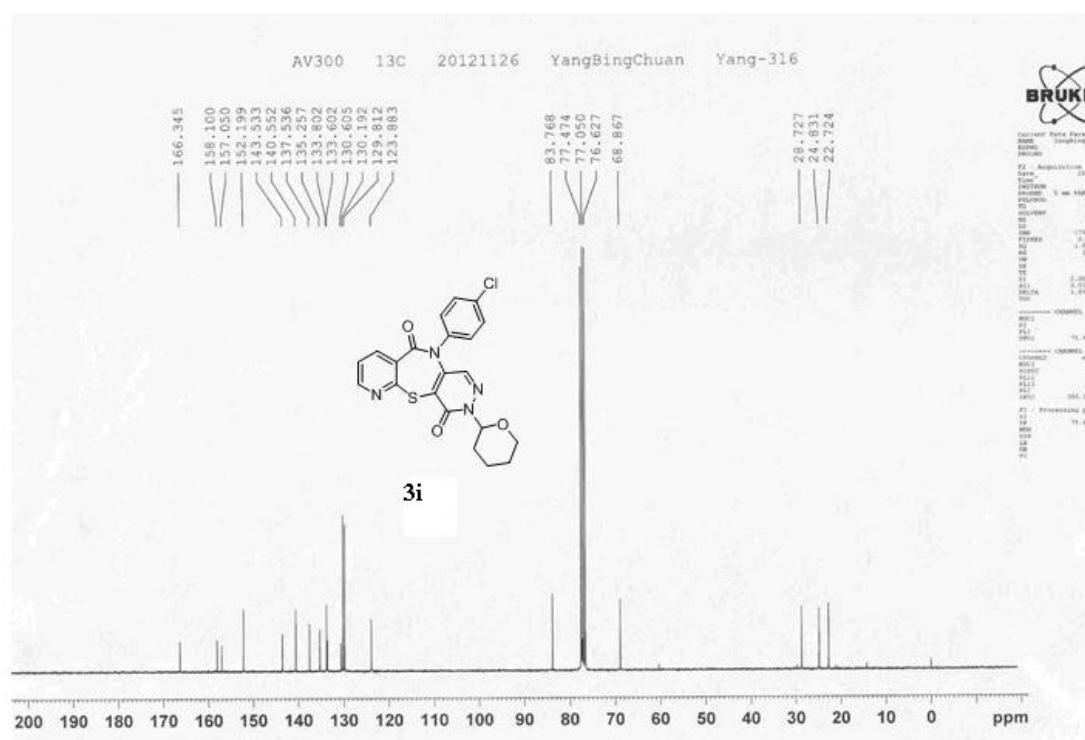

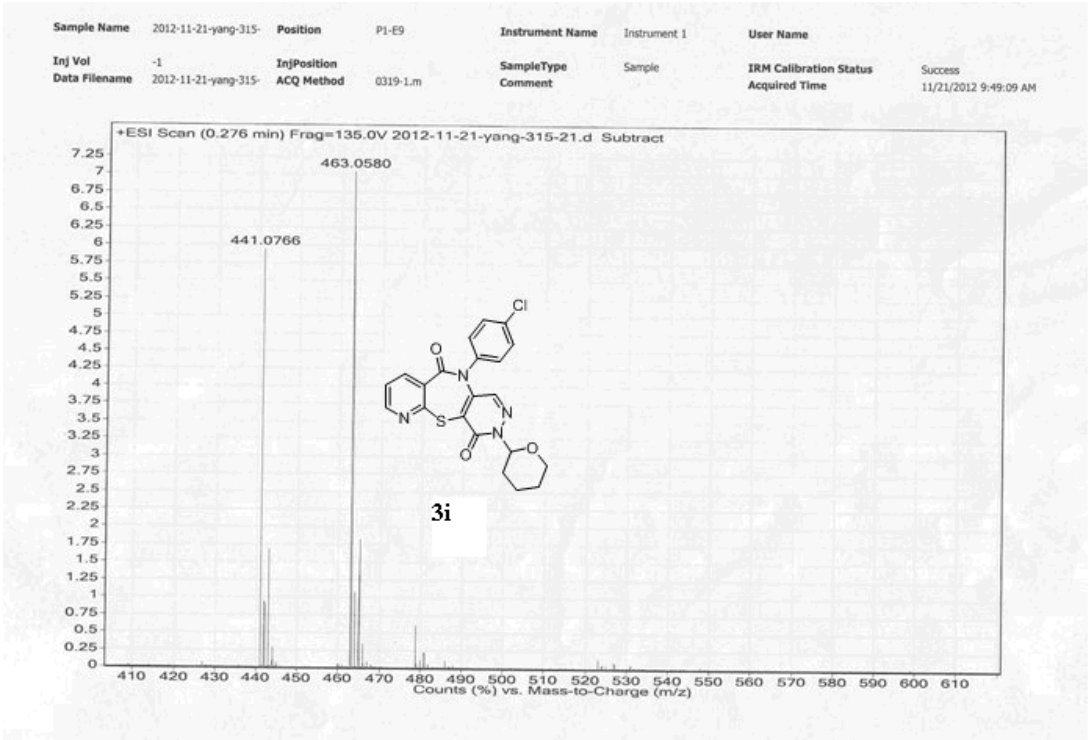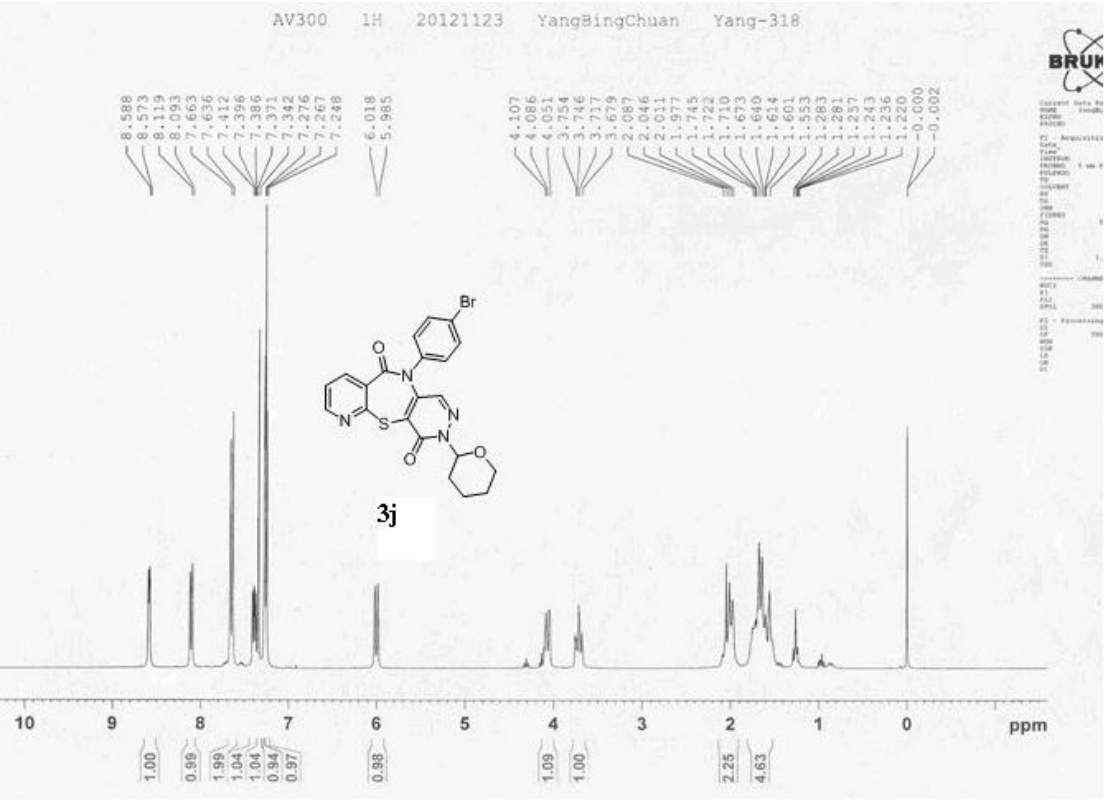

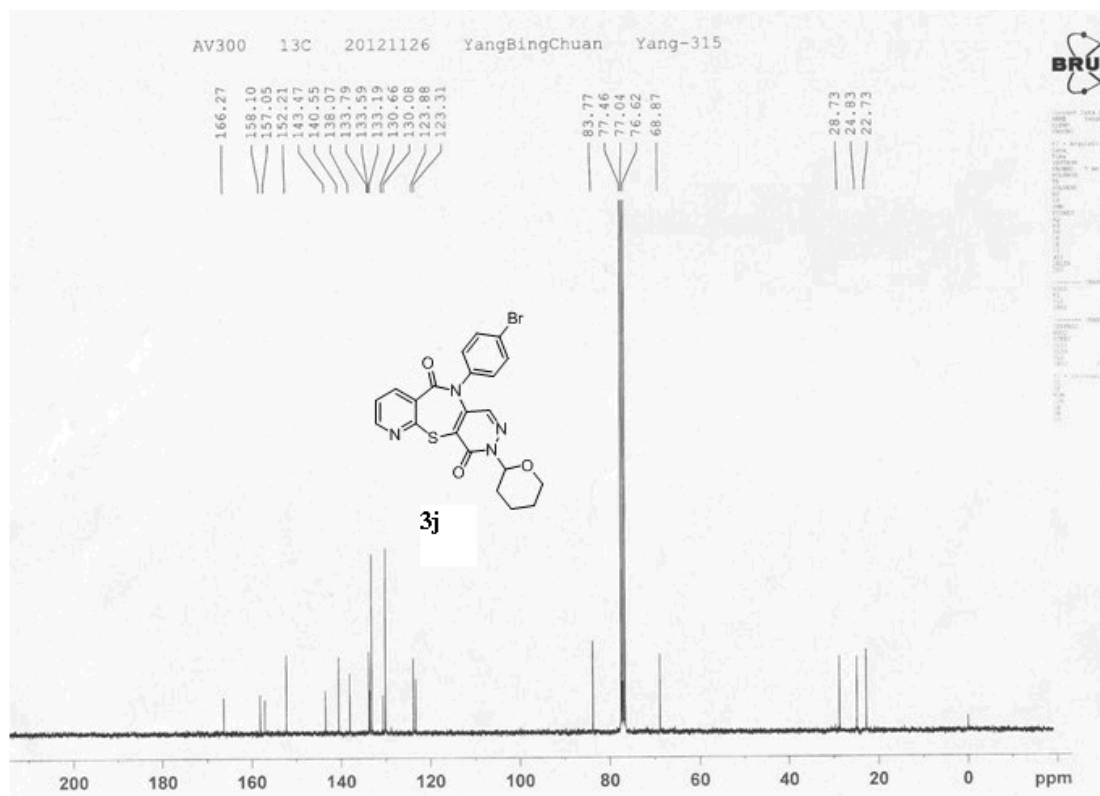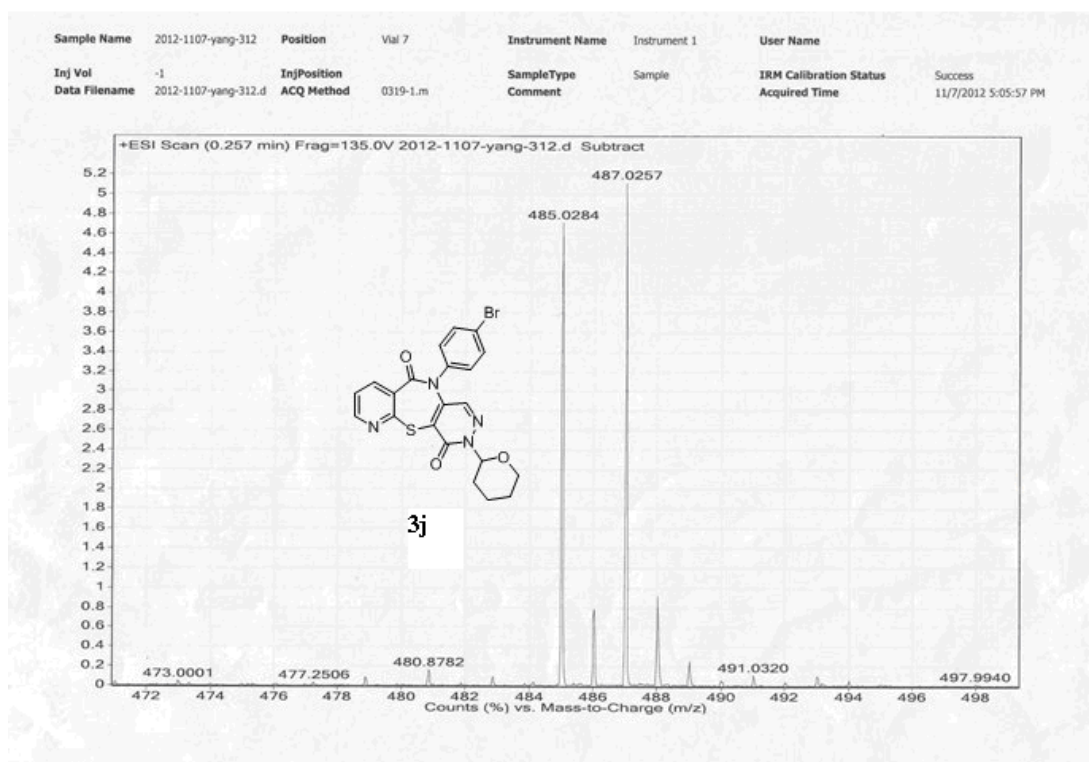

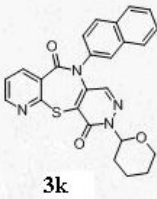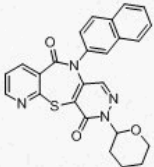

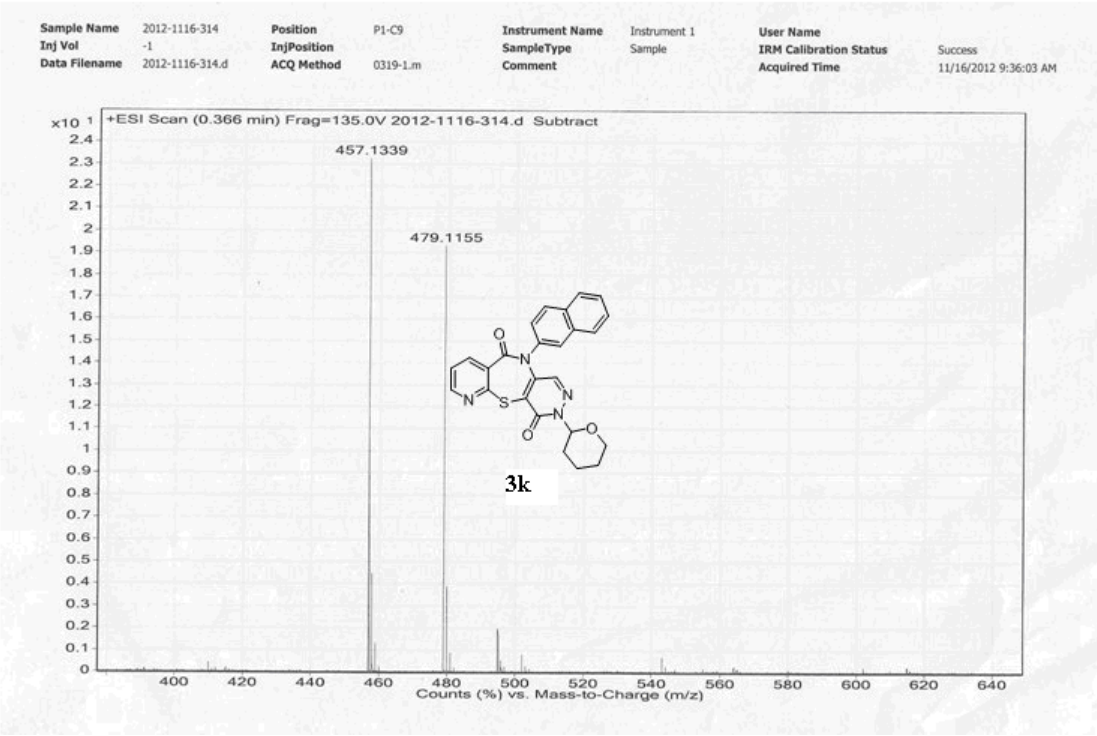



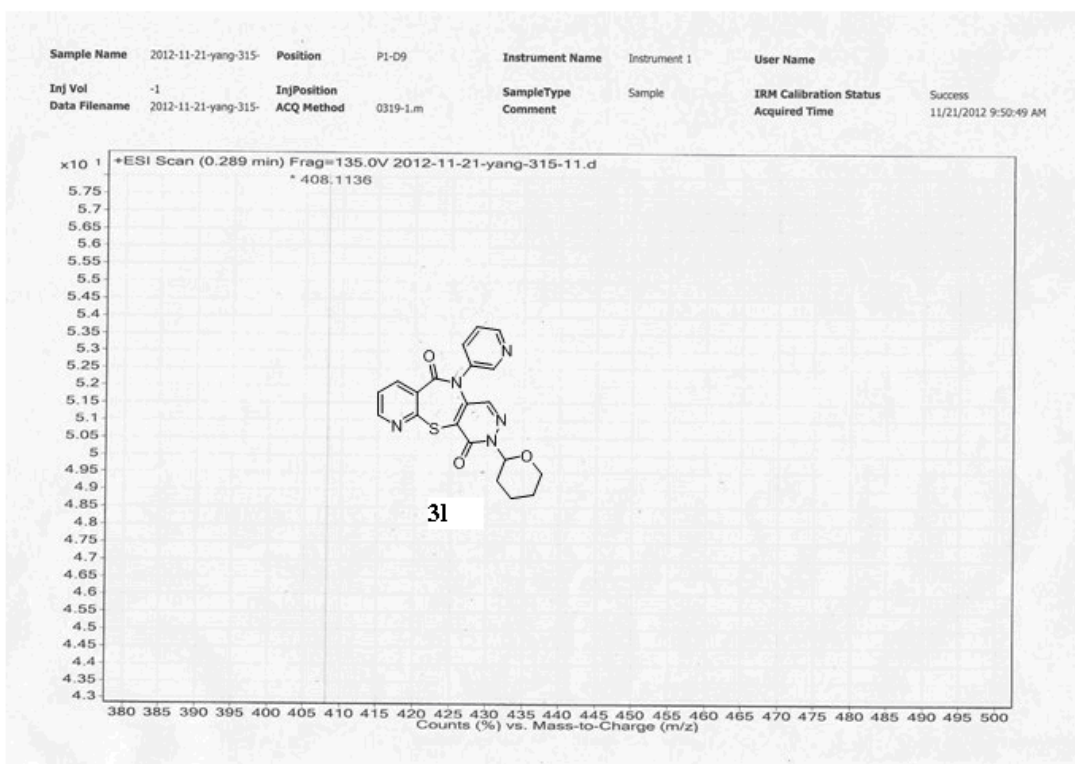

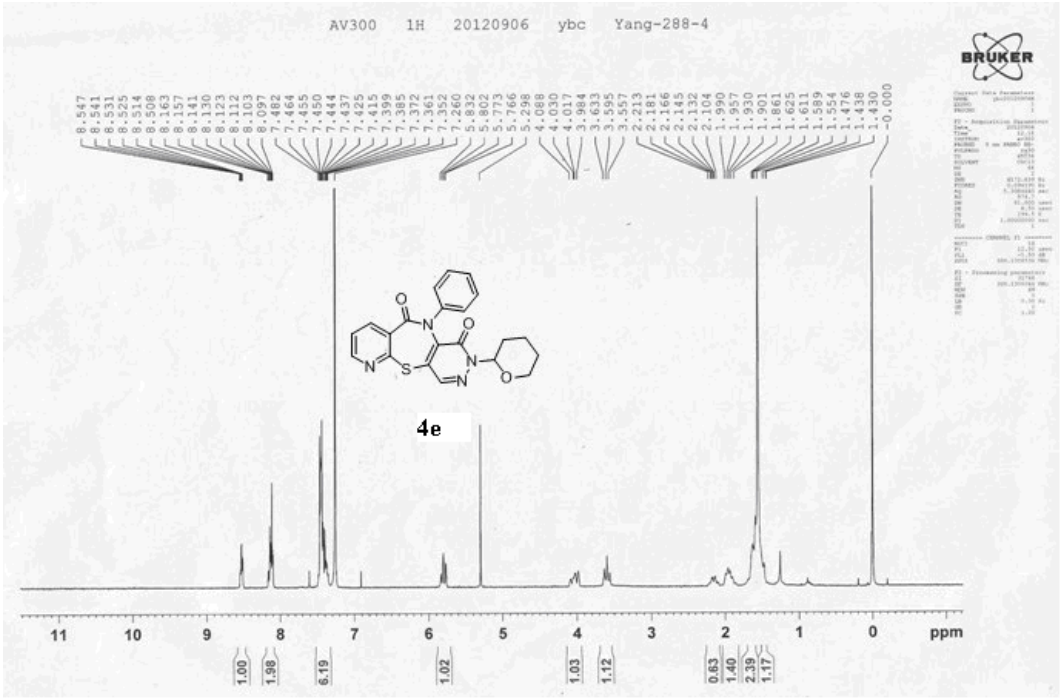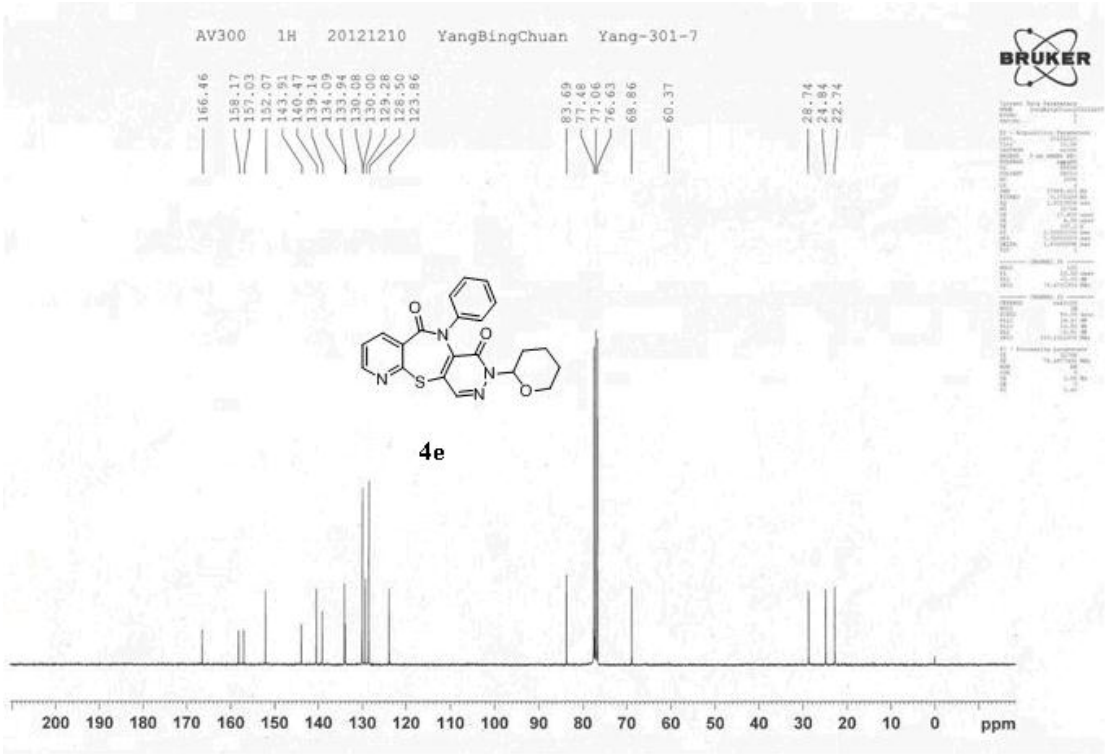

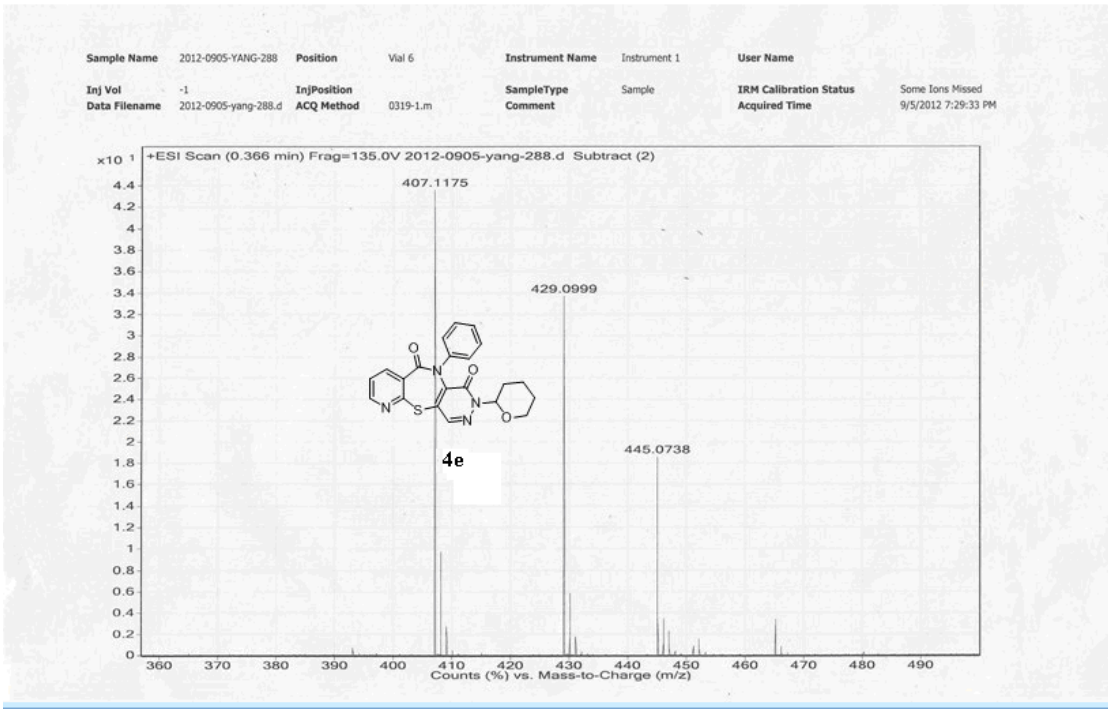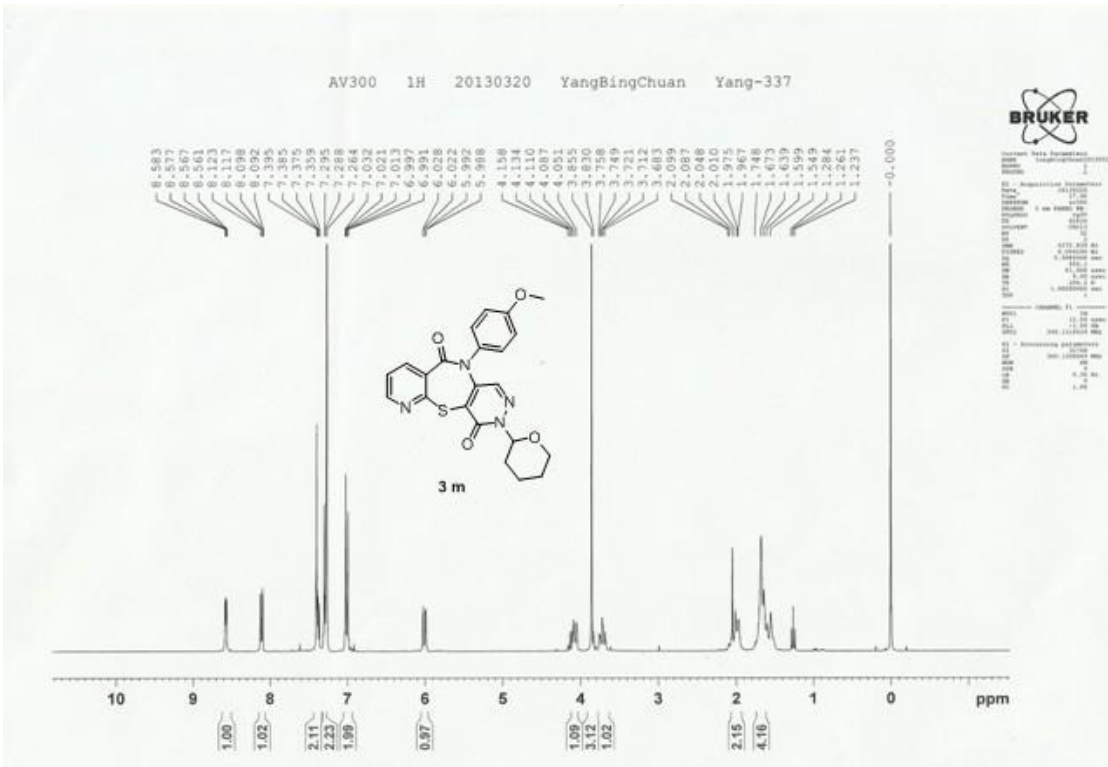

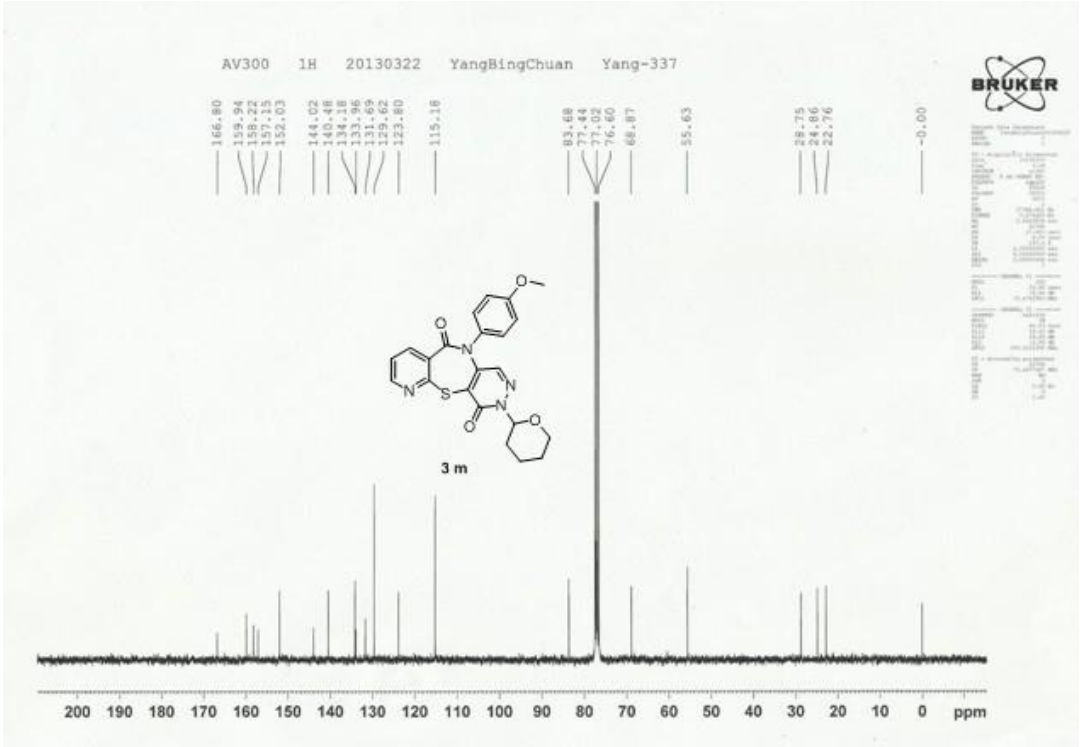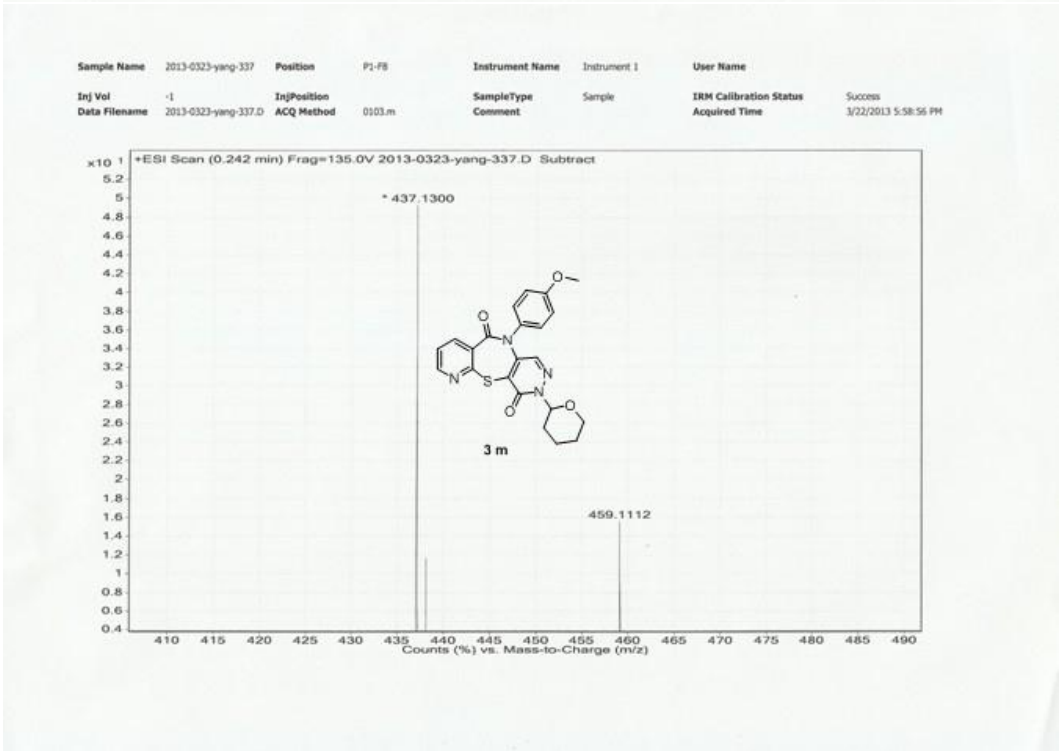

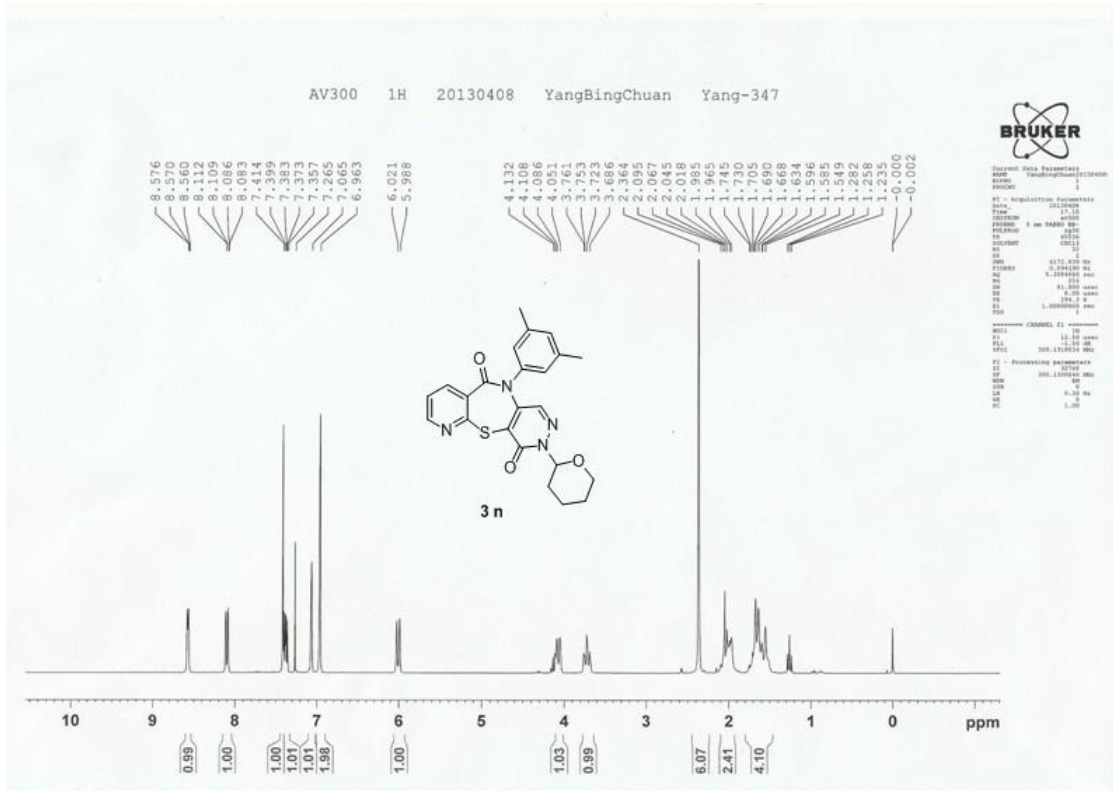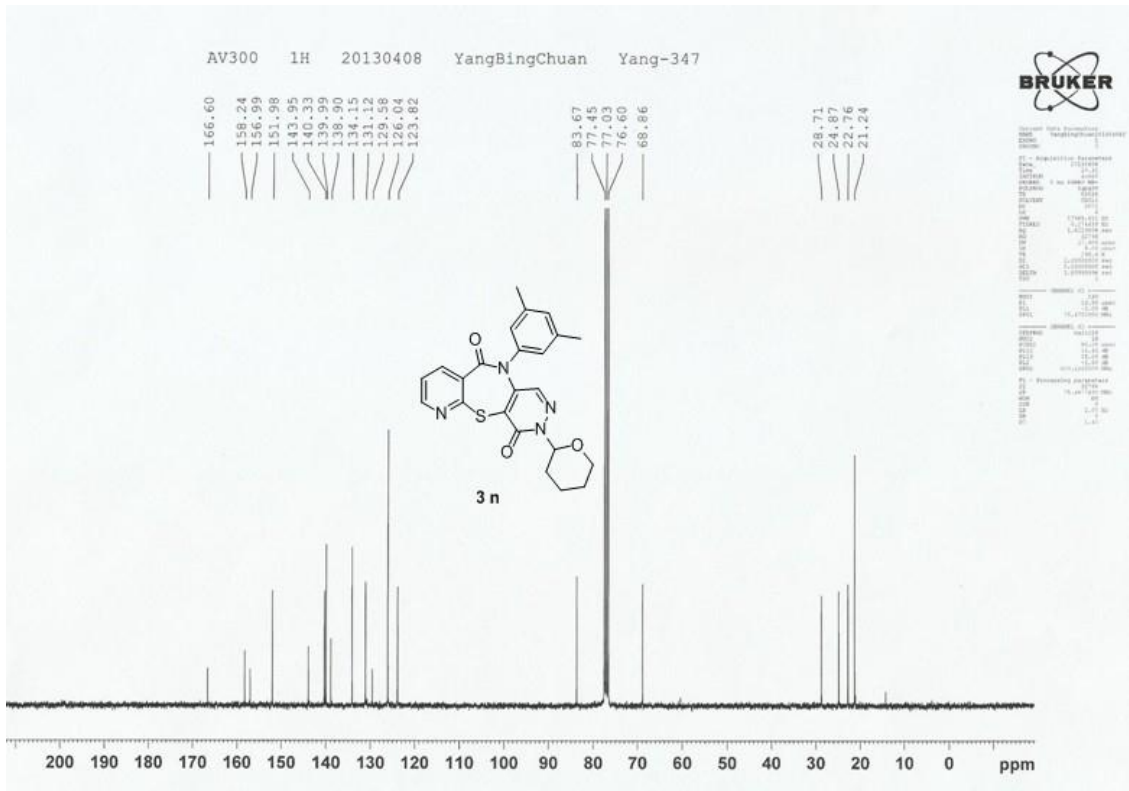



|               |                      |             |        |                 |              |                        |                      |
|---------------|----------------------|-------------|--------|-----------------|--------------|------------------------|----------------------|
| Sample Name   | 2013-0408-yang-347   | Position    | P1-E8  | Instrument Name | Instrument 1 | User Name              |                      |
| Inj Vol       | -1                   | InjPosition |        | SampleType      | Sample       | IRM Calibration Status | Success              |
| Data Filename | 2013-0408-yang-347.d | ACQ Method  | 0103.m | Comment         |              | Acquired Time          | 8/11/2010 2:12:51 PM |

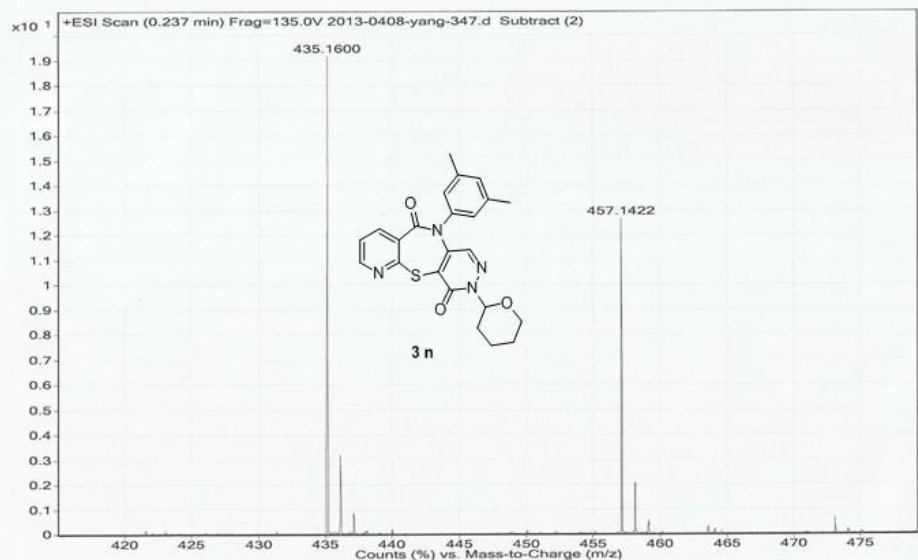

Supplement: c3ob40719e.pdf [file c3ob40719e.pdf]
